# Supplementary material
Source: PubMed Central journal article supplement (PMC3754152)
Supplement: AEM.00268-13_zam999104631so1.pdf [file AEM.00268-13_zam999104631so1.pdf]

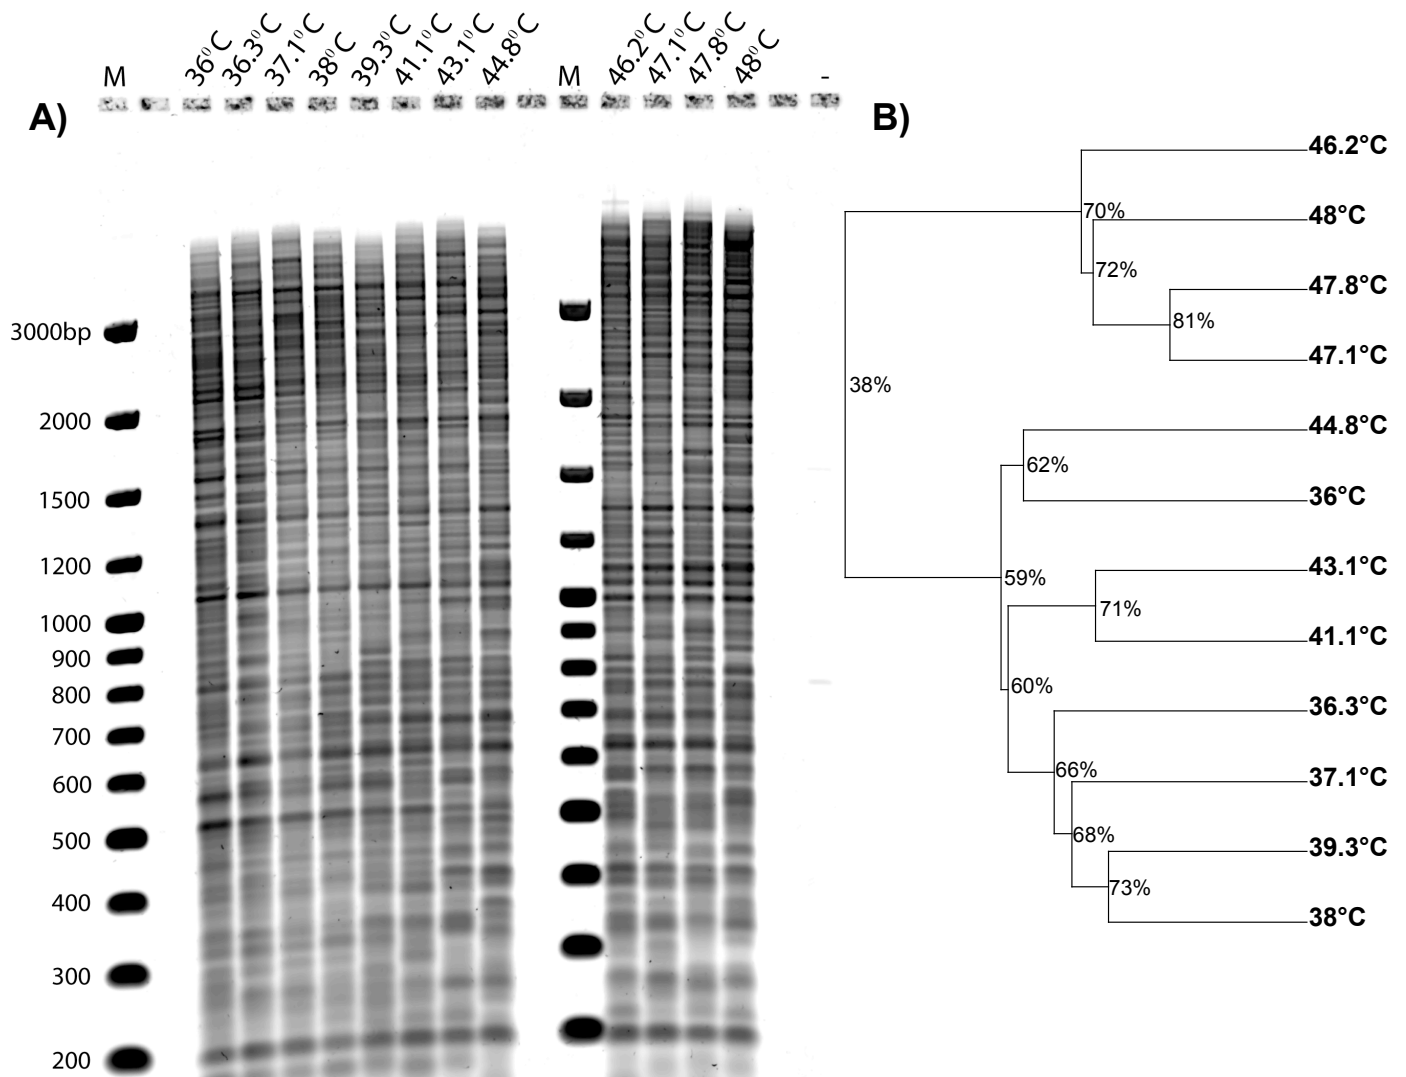

**Supplementary Fig. S1.** Gradient of annealing temperatures for primer HCB-1. A) RAPD-PCR fingerprints of whole viral assemblages from a single Delaware soil sample across a gradient of annealing temperatures, 36 to 48° C. Lanes marked "M" are marker lanes; Lane marked "-" is no-template control. B) Hierarchical clustering dendrogram (UPGMA) of Dice's similarities between banding patterns at different annealing temperatures. Similarity values are shown at each node.

Supplementary Table S2. Viral metagenome libraries used in the design of RAPD-PCR primers. Detailed information on the viral metagenome libraries used in RAPD-PCR primer design can be found at <http://virome.dbi.udel.edu>

| Environment          | Habitat             | Location                                              | Viral libraries                                                                            | Reference                |
|----------------------|---------------------|-------------------------------------------------------|--------------------------------------------------------------------------------------------|--------------------------|
| Water                | Estuary             | Chesapeake Bay                                        | CBAY_Bench                                                                                 | (Bench et al, 2007)      |
|                      |                     |                                                       | CBAY_JCVI<br>CBAY_IND-01<br>CBAY_IND02<br>CBAYVIR01<br>CBAYVIR02<br>CBAYVIR03<br>CBAYVIR04 |                          |
| Extreme Environments | Ocean               | Dry Tortugas [Gulf of Mexico]                         | DRYTV1R015                                                                                 | (Schoenfeld et al, 2008) |
|                      |                     | Gulf of Maine                                         | GOMV1R04                                                                                   |                          |
| Extreme Environments | Hot springs         | Bear Paw hot spring [Yellowstone National Park]       | HOTSPR_BP                                                                                  | (Schoenfeld et al, 2008) |
|                      | Deep Sea            | Octopus hot spring [Yellowstone National Park]        | HOTSPR_05                                                                                  | (Schoenfeld et al, 2008) |
| Sludge               | Human sewage sludge | H.C. Morgan water pollution control facility [Auburn] | VENT_GWAB                                                                                  | (Parsley et al, 2010)    |
|                      |                     |                                                       | VENT_GWAC<br>VENT_GWAD                                                                     |                          |
| Soil                 | Agricultural        | Matapeake soil [Delaware]                             | SLUDGE_AS                                                                                  | (Parsley et al, 2010)    |
|                      |                     | Wisconsin soil [Wisconsin]                            | SLUDGE_IN                                                                                  |                          |
| Soil                 | Desert              | Mojave Desert [California]                            | SOIL_DE                                                                                    | (Fierer et al, 2007)     |
|                      | Prairie             | Konza Prairie [Kansas]                                | SOIL_WI                                                                                    |                          |
|                      | Forest              | Manu National Park [Peru]                             | SOIL_JT                                                                                    |                          |
| Soil                 | Forest              | Manu National Park [Peru]                             | SOIL_KS                                                                                    | (Fierer et al, 2007)     |
|                      |                     |                                                       | SOIL_PERU                                                                                  | (Fierer et al, 2007)     |

**Bench, S. R., T. E. Hanson, K. E. Williamson, D. Ghosh, M. Radosovich, K. Wang, and K. E. Wommack.** 2007. Metagenomic characterization of Chesapeake Bay viroplankton. *Appl Environ Microbiol* **73**:7629-7641.

**Schoenfeld, T., M. Patterson, P. M. Richardson, K. E. Wommack, M. Young, and D. Mead.** 2008. Assembly of viral metagenomes from Yellowstone hot springs. *Appl. Environ. Microbiol.* **74**:4164-4174.

**Parsley, L. C., E. J. Consuegra, S. J. Thomas, J. Bhavsar, A. M. Land, N. N. Bhuiyan, M. A. Mazher, R. J. Waters, K. E. Wommack, W. F. Harper, and M. R. Liles.** 2010. Census of the viral metagenome within an activated sludge microbial assemblage. *Appl Environ Microbiol* **76**:2673-2677.

**Fierer, N., M. Breitbart, J. Nulton, P. Salamon, C. Lozupone, R. Jones, M. Robeson, R. A. Edwards, B. Felts, S. Rayhawk, R. Knight, F. Rohwer, and R. B. Jackson.** 2007. Metagenomic and small-subunit rRNA analyses reveal the genetic diversity of bacteria, archaea, fungi, and viruses in soil. *Appl Environ Microbiol* **73**:7059-7066.
